# Supplementary material for: Targeted Muscle Reinnervation for Limb Amputation to Avoid Neuroma and Phantom Limb Pain in Patients Treated at a Pediatric Hospital
Source: PubMed Central journal article supplement — Plast Reconstr Surg Glob Open. 2023 Apr 13;11(4):e4944. doi: 10.1097/GOX.0000000000004944 (PMC10101300; doi:10.1097/gox.0000000000004944), 2023-04-13
Supplement: gox-11-e4944-s001.pdf [file gox-11-e4944-s001.pdf]

Supplemental Tables:

Table S1: Patients were asked the included questions twice, once in regard to pain in the residual limb and once for pain in the phantom limb. Questions comprising the PROMIS® Numerical Pain Scale, Pain Behavior, Pain Interference, Pain Quality-Affective and Pain Quality-Sensory were included.

| <b>PROMIS® Pediatric Numeric Rating Scale v 1.0</b>                          |                    |                     |                     |                  |                      |                      |    |    |    |    |                         | <b>Worse Pain</b> |
|------------------------------------------------------------------------------|--------------------|---------------------|---------------------|------------------|----------------------|----------------------|----|----|----|----|-------------------------|-------------------|
| <b>In the past 7 days...</b>                                                 | <b>No Pain</b>     |                     |                     |                  |                      |                      |    |    |    |    | <b>you can think of</b> |                   |
| How bad was your pain on average?                                            | 0□                 | 1□                  | 2□                  | 3□               | 4□                   | 5□                   | 6□ | 7□ | 8□ | 9□ | 10□                     |                   |
| <b>PROMIS® Pediatric Item Bank v2.0 Pain Behavior Short Form 8a</b>          |                    |                     |                     |                  |                      |                      |    |    |    |    |                         |                   |
| <b>In the past 7 days, when I was in pain...</b>                             | <b>Had No Pain</b> | <b>Never</b>        | <b>Almost Never</b> | <b>Sometimes</b> | <b>Often</b>         | <b>Almost Always</b> |    |    |    |    |                         |                   |
| It showed on my face                                                         | 0□                 | 1□                  | 2□                  | 3□               | 4□                   | 5□                   |    |    |    |    |                         |                   |
| I moved slower                                                               | 0□                 | 1□                  | 2□                  | 3□               | 4□                   | 5□                   |    |    |    |    |                         |                   |
| I protected the part of my body that hurt                                    | 0□                 | 1□                  | 2□                  | 3□               | 4□                   | 5□                   |    |    |    |    |                         |                   |
| I had to stop what I was doing                                               | 0□                 | 1□                  | 2□                  | 3□               | 4□                   | 5□                   |    |    |    |    |                         |                   |
| I asked for someone to help me                                               | 0□                 | 1□                  | 2□                  | 3□               | 4□                   | 5□                   |    |    |    |    |                         |                   |
| I lay down                                                                   | 0□                 | 1□                  | 2□                  | 3□               | 4□                   | 5□                   |    |    |    |    |                         |                   |
| I asked for medicine                                                         | 0□                 | 1□                  | 2□                  | 3□               | 4□                   | 5□                   |    |    |    |    |                         |                   |
| I talked about my pain                                                       | 0□                 | 1□                  | 2□                  | 3□               | 4□                   | 5□                   |    |    |    |    |                         |                   |
| <b>PROMIS® Pediatric Item Bank v2.0 Pain Interference Short Form 8a</b>      |                    |                     |                     |                  |                      |                      |    |    |    |    |                         |                   |
| <b>In the past 7 days...</b>                                                 | <b>Never</b>       | <b>Almost Never</b> | <b>Sometimes</b>    | <b>Often</b>     | <b>Almost Always</b> |                      |    |    |    |    |                         |                   |
| I felt angry when I had pain                                                 | 1□                 | 2□                  | 3□                  | 4□               | 5□                   |                      |    |    |    |    |                         |                   |
| I had trouble doing schoolwork when I had pain                               | 1□                 | 2□                  | 3□                  | 4□               | 5□                   |                      |    |    |    |    |                         |                   |
| I had trouble sleeping when I had pain                                       | 1□                 | 2□                  | 3□                  | 4□               | 5□                   |                      |    |    |    |    |                         |                   |
| It was hard for me to pay attention when I had pain                          | 1□                 | 2□                  | 3□                  | 4□               | 5□                   |                      |    |    |    |    |                         |                   |
| It was hard for me to run when I had pain                                    | 1□                 | 2□                  | 3□                  | 4□               | 5□                   |                      |    |    |    |    |                         |                   |
| It was hard for me to walk one block when I had pain                         | 1□                 | 2□                  | 3□                  | 4□               | 5□                   |                      |    |    |    |    |                         |                   |
| It was hard to have fun when I had pain                                      | 1□                 | 2□                  | 3□                  | 4□               | 5□                   |                      |    |    |    |    |                         |                   |
| It was hard to stay standing when I had pain                                 | 1□                 | 2□                  | 3□                  | 4□               | 5□                   |                      |    |    |    |    |                         |                   |
| <b>PROMIS® Pediatric Item Bank v2.0 Pain Quality-Affective Short Form 8a</b> |                    |                     |                     |                  |                      |                      |    |    |    |    |                         |                   |
| <b>In the past 7 days, did your pain feel...</b>                             | <b>No</b>          | <b>Yes</b>          |                     |                  |                      |                      |    |    |    |    |                         |                   |
| miserable?                                                                   | 0□                 | 1□                  |                     |                  |                      |                      |    |    |    |    |                         |                   |
| awful?                                                                       | 0□                 | 1□                  |                     |                  |                      |                      |    |    |    |    |                         |                   |
| horrible?                                                                    | 0□                 | 1□                  |                     |                  |                      |                      |    |    |    |    |                         |                   |
| unbearable?                                                                  | 0□                 | 1□                  |                     |                  |                      |                      |    |    |    |    |                         |                   |
| worrying?                                                                    | 0□                 | 1□                  |                     |                  |                      |                      |    |    |    |    |                         |                   |
| unending?                                                                    | 0□                 | 1□                  |                     |                  |                      |                      |    |    |    |    |                         |                   |
| annoying?                                                                    | 0□                 | 1□                  |                     |                  |                      |                      |    |    |    |    |                         |                   |
| unpleasant?                                                                  | 0□                 | 1□                  |                     |                  |                      |                      |    |    |    |    |                         |                   |
| <b>PROMIS® Pediatric Item Bank v2.0 Pain Quality-Sensory Short Form 8a</b>   |                    |                     |                     |                  |                      |                      |    |    |    |    |                         |                   |

| In the past 7 days, did your pain feel... | Not at all                 | A little bit               | Somewhat                   | Quite a bit                | Very much                  |
|-------------------------------------------|----------------------------|----------------------------|----------------------------|----------------------------|----------------------------|
| sharp?                                    | 1 <input type="checkbox"/> | 2 <input type="checkbox"/> | 3 <input type="checkbox"/> | 4 <input type="checkbox"/> | 5 <input type="checkbox"/> |
| achy?                                     | 1 <input type="checkbox"/> | 2 <input type="checkbox"/> | 3 <input type="checkbox"/> | 4 <input type="checkbox"/> | 5 <input type="checkbox"/> |
| burning?                                  | 1 <input type="checkbox"/> | 2 <input type="checkbox"/> | 3 <input type="checkbox"/> | 4 <input type="checkbox"/> | 5 <input type="checkbox"/> |
| throbbing?                                | 1 <input type="checkbox"/> | 2 <input type="checkbox"/> | 3 <input type="checkbox"/> | 4 <input type="checkbox"/> | 5 <input type="checkbox"/> |
| stabbing?                                 | 1 <input type="checkbox"/> | 2 <input type="checkbox"/> | 3 <input type="checkbox"/> | 4 <input type="checkbox"/> | 5 <input type="checkbox"/> |
| sore?                                     | 1 <input type="checkbox"/> | 2 <input type="checkbox"/> | 3 <input type="checkbox"/> | 4 <input type="checkbox"/> | 5 <input type="checkbox"/> |
| tight?                                    | 1 <input type="checkbox"/> | 2 <input type="checkbox"/> | 3 <input type="checkbox"/> | 4 <input type="checkbox"/> | 5 <input type="checkbox"/> |
| tingly?                                   | 1 <input type="checkbox"/> | 2 <input type="checkbox"/> | 3 <input type="checkbox"/> | 4 <input type="checkbox"/> | 5 <input type="checkbox"/> |

| Supplemental Table 2: Patient Demographics and Clinical Course |     |                      |                     |               |                                       |                   |                  |                                                                                                                                                                                                                                                                                                                      |                                             |                   |                          |
|----------------------------------------------------------------|-----|----------------------|---------------------|---------------|---------------------------------------|-------------------|------------------|----------------------------------------------------------------------------------------------------------------------------------------------------------------------------------------------------------------------------------------------------------------------------------------------------------------------|---------------------------------------------|-------------------|--------------------------|
| ID                                                             | Sex | Age at Surgery (yrs) | F/U at survey (mos) | Diagnosis     | Clinical Treatment                    | Oncologic Outcome | Amputation Level | TMR Procedures                                                                                                                                                                                                                                                                                                       | Narcotic Use                                | Neuromodulators   | Time to Prosthesis (mos) |
| 1                                                              | M   | 17.8                 | 26.7                | Osteosarcoma  | Adjuvant chemotherapy                 | Metastatic        | AKA              | 1. Peroneal component of the sciatic nerve to the motor branch of biceps femoris.<br>2. Tibial component of the sciatic nerve to the motor branch of semitendinosus.<br>3. Saphenous nerve to motor branch adductor.<br>** Neuroma in non-TMR nerve (lateral femoral cutaneous nerve). Excision/revision at 12months | stopped at 8 mos; now continuous, as needed | none at 11 months | 2                        |
| 2                                                              | M   | 17                   | 16.5                | Ewing Sarcoma | Neoadjuvant and adjuvant chemotherapy | Metastatic        | AKA              | 1. Saphenous to adductor<br>2. Common Peroneal to biceps femoris<br>3. Tibial to semitendinosus and semimembranosus                                                                                                                                                                                                  | none at 6 months                            | none at 10 months | 6                        |
| 3                                                              | M   | 17.8                 | 12.4                | Osteosarcoma  | Neoadjuvant and adjuvant chemotherapy | NED               | BKA              | 1. Saphenous to motor nerve of medial soleus<br>2. Tibial nerve to motor branch of medial gastroc<br>3. Peroneal nerve to motor branch of peroneus longus<br>4. Sural nerve to motor branch of lateral gastroc                                                                                                       | none at 4 weeks                             | none at 6 weeks   | 5                        |

|                                                                                                                  |   |      |      |                          |                                       |                            |                                |                                                                                                                                                                                                                                                                                                                                                                                                                                                                                                                      |                                       |                          |              |
|------------------------------------------------------------------------------------------------------------------|---|------|------|--------------------------|---------------------------------------|----------------------------|--------------------------------|----------------------------------------------------------------------------------------------------------------------------------------------------------------------------------------------------------------------------------------------------------------------------------------------------------------------------------------------------------------------------------------------------------------------------------------------------------------------------------------------------------------------|---------------------------------------|--------------------------|--------------|
| 4                                                                                                                | M | 17.7 | 16.3 | Giant Cell Tumor of Bone | None                                  | Metastatic                 | Middle Ray Resection           | 1. Middle finger radial digital nerve to interossei<br>2. Middle finger ulnar digital nerve to interossei                                                                                                                                                                                                                                                                                                                                                                                                            | none at 4 weeks                       | began at 16 to 19 months | N/A          |
| 5                                                                                                                | M | 9    | 14.3 | Osteosarcoma             | Neoadjuvant and adjuvant chemotherapy | Metastatic died of disease | Trans-radial                   | 1. radial sensory to brachioradialis<br>2. Median nerve to motor branch of FDS and FDP<br>3. Ulnar nerve to motor branch of FCU                                                                                                                                                                                                                                                                                                                                                                                      | none at 4 weeks                       | continued use            | N/A          |
| 6                                                                                                                | M | 18.1 | 40.5 | Ewing Sarcoma            | Neoadjuvant and adjuvant chemotherapy | NED                        | BKA                            | 1. Tibial nerve x2 transfers to gastrocnemius muscle motor nerve branches – one medial aspect and another lateral aspect<br>2. Peroneal nerve transfer to peroneus longus muscle motor nerve branch<br>3. Saphenous nerve transfer to medial soleus muscle motor nerve branch                                                                                                                                                                                                                                        | PRN after 3 months, none by 14 months | none at 15 months        | 3            |
| 7                                                                                                                | F | 14.2 | 17.8 | Trauma                   |                                       |                            | BKA                            | 1. Saphenous nerve to distal vastus medialis motor nerve<br>2. Posterior tibial nerve to distal gastroc<br>3. sural nerve no healthy motor nerve branches<br>4. peroneal nerve - no healthy motor nerve branches                                                                                                                                                                                                                                                                                                     | none by 12months                      | continued use            | 6            |
| 8                                                                                                                | M | 2.9  | 24.7 | Septic Shock             |                                       |                            | Bilateral BKA<br>Bilateral AEA | Left UE: 1. Median nerve to biceps branch of musculocutaneous nerve<br>Left UE: 2. Ulnar nerve to biceps motor nerve<br>Right UE: 1. Median nerve to motor branch of biceps tendon<br>Right UE: 2. Ulnar nerve to the posterior branch of the triceps muscle<br>Bilateral LE: 1. Tibial component of sciatic nerve to motor branch of posterior thigh (semimembranosus, semitendinosus)<br>Bilateral LE: 2. Peroneal component of sciatic nerve to motor branch of posterior thigh (semimembranosus, semitendinosus) | uncertain                             | continued use            | UE 6<br>LE 7 |
| 9                                                                                                                | F | 23.1 | 22.8 | Chronic Osteomyelitis    |                                       |                            | AKA                            | 1. tibial component of sciatic nerve transfer to motor branch of semitendinosus muscle and<br>2. peroneal component of sciatic nerve to motor branch of biceps femoris<br>3. Saphenous nerve burying into adductor muscle                                                                                                                                                                                                                                                                                            | continuous, as needed                 | continued use            | N/A          |
| AKA: Above knee amputation; BKA: Below knee amputation; AEA: Above elbow amputation; NED: No evidence of disease |   |      |      |                          |                                       |                            |                                |                                                                                                                                                                                                                                                                                                                                                                                                                                                                                                                      |                                       |                          |              |
