# Supplementary figures and images for: Targeted Muscle Reinnervation for Limb Amputation to Avoid Neuroma and Phantom Limb Pain in Patients Treated at a Pediatric Hospital
Source: PubMed Central journal article supplement — Plast Reconstr Surg Glob Open. 2023 Apr 13;11(4):e4944. doi: 10.1097/GOX.0000000000004944 (PMC10101300; doi:10.1097/gox.0000000000004944), 2023-04-13

# Narcotic Use

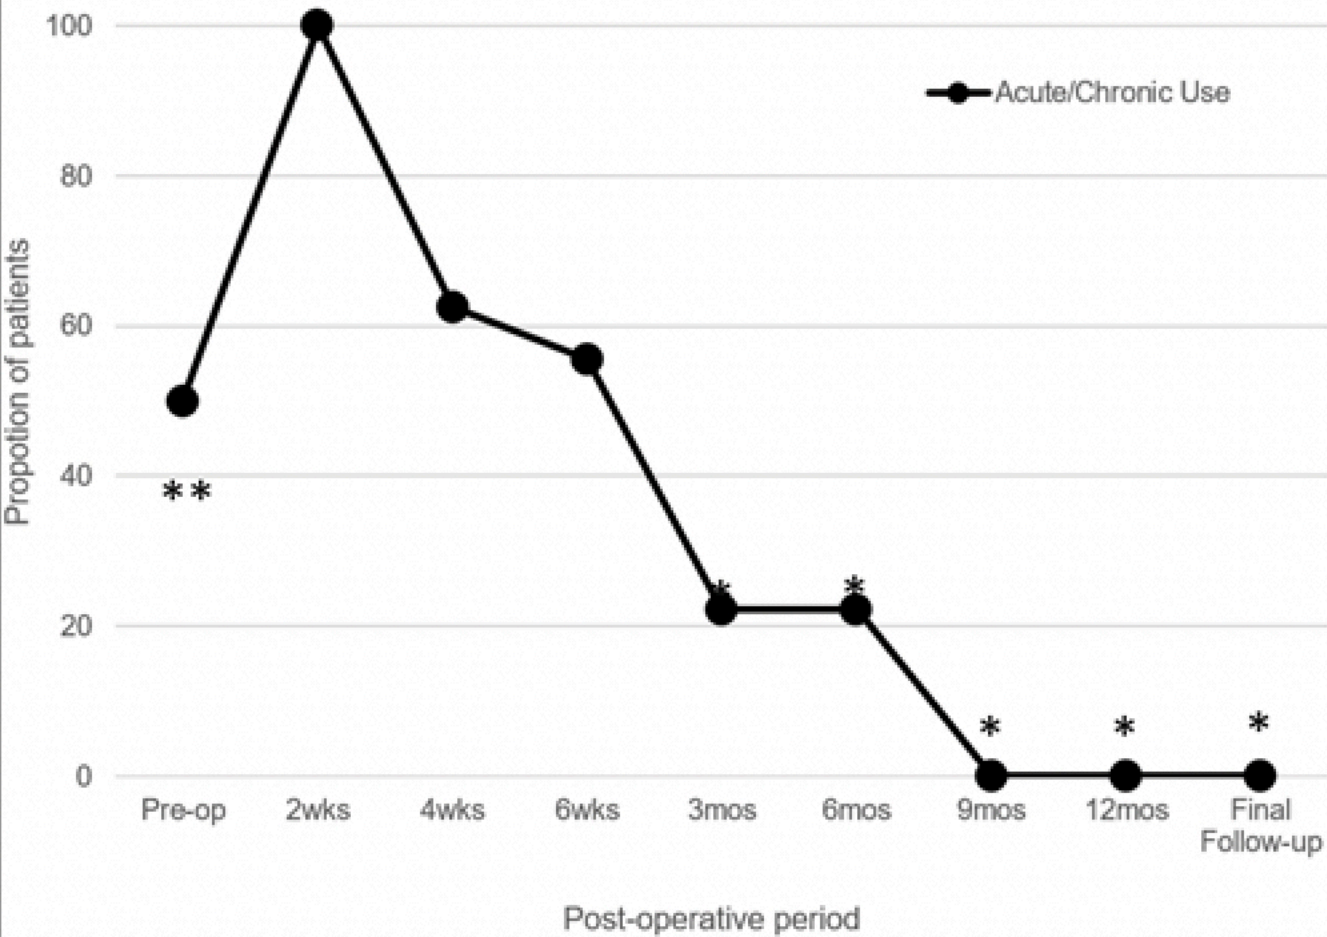

Supplement: gox-11-e4944-s002.pdf [file gox-11-e4944-s002.pdf]
